# Supplementary material for: The effect of walking speed on the foot inter-segment kinematics, ground reaction forces and lower limb joint moments
Source: PeerJ. 2018 Aug 23;6:e5517. doi: 10.7717/peerj.5517 (PMC6109584; doi:10.7717/peerj.5517)
Supplement: Supplemental Information 2 [file peerj-06-5517-s002.xlsx]

## Sheet: Hindfoot Tibia
Slow Walking (SW)	DF (IC)	DF(MAX)	PF(MAX)	ROM(DF/PF)	Normal Walking (NW)	DF (IC)	DF(MAX)	PF(MAX)	ROM(DF/PF)	Fast Walking (FW)	DF (IC)	DF(MAX)	PF(TO)	ROM(DF/PF)
Hindfoot/Tibia (HF/TB)					Hindfoot/Tibia (HF/TB)					Hindfoot/Tibia (HF/TB)
1	3.8	21	0.6	23.5	1	8.2	17.7	-0.3	20	1	11.7	31.8	-0.1	31.9
2	4.1	16.8	-6.6	23.4	2	4.2	18.7	-0.6	24.4	2	11.8	27	0.6	26.4
3	3.9	19.3	0.4	18.9	3	5.9	18.7	-2.6	21.3	3	9.7	29.8	-0.6	30.4
4	8.6	19.9	2.3	20.9	4	6.4	18.5	-0.8	23.3	4	9	27	-1.9	28.9
5	4.8	19	1.5	20	5	4.5	15.9	-0.7	20.6	5	10.5	30.8	-3.5	34.3
6	6.4	17.8	-0.2	21	6	5.2	17.2	-0.1	24.3	6	9.4	29.9	-4.2	34.1
7	6.5	20.8	3.8	22.3	7	5.8	17.6	0.6	21.2	7	8.6	30.4	-1.5	31.9
8	3.8	19.3	2.1	20.4	8	4.9	17.6	0.5	23.1	8	8	30.1	0.6	29.5
9	6.5	18.5	-1.7	20.2	9	6.2	17.5	0.4	22.5	9	8.3	29	1.4	27.6
10	8.1	19	-0.8	19.8	10	8.8	17.8	0.5	22.3	10	9.9	29.3	3.2	26.1
Mean	5.7	19.1	0.1	21	Mean	6	17.7	-0.3	22.3	Mean	9.7	29.5	-0.6	30.1
Slow Walking (SW)	EV(IC)	EV(MAX)	IV(MAX)	ROM(IV/EV)	Normal Walking (NW)	EV(IC)	EV(MAX)	IV(MAX)	ROM(IV/EV)	Fast Walking (FW)	EV(IC)	EV(MAX)	IV(MAX)	ROM(IV/EV)
Hindfoot/Tibia (HF/TB)					Hindfoot/Tibia (HF/TB)					Hindfoot/Tibia (HF/TB)
1	-5.6	-25.8	3.6	29.4	1	-12	-24.1	3.8	27.9	1	-13	-20.7	-2.7	18
2	-8.9	-20.4	7.6	28	2	-10.8	-23.8	4.7	28.5	2	-13.4	-20.9	-1.5	19.4
3	-7.6	-24.3	1.9	26.2	3	-7.3	-21.7	4.5	26.2	3	-14.1	-23.6	-0.4	23.2
4	-11.3	-24.6	2	26.6	4	-10.9	-19.4	5	24.4	4	-13.3	-19.8	1.6	21.4
5	-8.1	-22.1	1.9	24	5	-6.5	-20.2	2.7	22.9	5	-11.9	-20.2	1.2	21.4
6	-7.5	-22.2	2.9	25.1	6	-11.1	-20.1	3.2	23.3	6	-14.2	-21	1.1	22.1
7	-9.4	-23.3	2.8	26.1	7	-10.3	-18.1	4.1	22.2	7	-16	-22.2	-1	21.2
8	-10.1	-20.2	2.3	22.5	8	-11.2	-20.6	3.1	23.7	8	-12.8	-21.2	0.9	22.1
9	-9.4	-22.9	3.2	26.1	9	-10.7	-22.1	4.2	25.3	9	-15.7	-22.5	0.1	22.6
10	-12.1	-20.6	3.7	24.3	10	-10.5	-21.4	4.1	25.1	10	-13.8	-22.9	-2.4	20.5
Mean	-9	-22.6	3.2	25.8	Mean	-10.1	-21.2	3.9	25	Mean	-13.8	-21.5	-0.3	21.2
Slow Walking (SW)	IR(IC)	ER(MAX)	IR(MAX)	ROM(IR/ER)	Normal Walking (NW)	IR(IC)	ER(MAX)	IR(MAX)	ROM(IR/ER)	Fast Walking (FW)	IR(IC)	ER(MAX)	IR(MAX)	ROM(IR/ER)
Hindfoot/Tibia (HF/TB)					Hindfoot/Tibia (HF/TB)					Hindfoot/Tibia (HF/TB)
1	2.4	-2.2	7.4	9.6	1	1.1	-1.5	7.2	8.7	1	3	-8.5	4.8	13.3
2	4.1	-1	9.5	10.5	2	3.1	-2.5	8.5	11	2	3	-8.7	5.1	13.8
3	1.3	-2.7	7.1	9.8	3	4.5	-2.4	8.2	10	3	3.7	-10	6.1	16.1
4	2.3	-1.9	8.3	10.2	4	3.2	-2.7	8.5	11.2	4	2.5	-7.9	6.7	14.6
5	3.5	-2.1	5.3	7.4	5	2.5	-2.1	7.9	9.1	5	3.2	-9.7	6.8	16.5
6	2.7	-1.3	7.9	9.2	6	2	-2.6	9.1	11.7	6	2.6	-9.2	6.2	15.4
7	2.8	-1.8	5.9	7.7	7	3.9	-2.2	8.2	9.3	7	2.3	-9.8	4.8	14.6
8	3.3	-2.5	5	7.5	8	3	-1.8	8.2	10	8	2.2	-8.2	4.9	13.1
9	2.2	-2.8	7.6	10.4	9	2.7	-2.6	8.9	11.3	9	1.7	-9.4	4.8	14.2
10	2.6	-2.1	7.8	9.9	10	2.8	-2.3	9.1	11.5	10	1.3	-8.9	5.3	14.2
Mean	2.7	-2	7.2	9.2	Mean	2.9	-2.3	8.4	10.4	Mean	2.6	-9	5.6	14.6
Slow Walking (SW)	DF(IC)	DF(MAX)	PF(TO)	ROM(DF/PF)	Normal Walking (NW)	DF(IC)	DF(MAX)	PF(TO)	ROM(DF/PF)	Fast Walking (FW)	DF(IC)	DF(MAX)	PF(TO)	ROM(DF/PF)
Forefoot/Hindfoot (FF/HF)					Forefoot/Hindfoot (FF/HF)					Forefoot/Hindfoot (FF/HF)
1	5.2	8	-9.2	17.2	1	1.4	8.8	-9.7	18.5	1	4.5	13	-5.7	13.7
2	3.6	9.4	-12	21.4	2	3.9	8.9	-11.1	20	2	3.5	13.4	-6.4	14.8
3	3.1	7.7	-10.2	17.9	3	3.6	9.8	-10	19.8	3	3.7	12.5	-5.7	14.2
4	3.8	8.8	-8.4	17.2	4	4.6	8.9	-11.8	20.7	4	4.8	13.2	-5.9	15.1
5	2.8	9.3	-8.4	17.7	5	4.4	8.9	-10.5	19.4	5	0.1	12.8	-5.7	11.5
6	1.9	10	-7.3	17.3	6	3.6	8.6	-10.8	19.4	6	4.9	13	-5.1	15.1
7	3.9	9.1	-8.8	17.9	7	3.4	9.7	-8.7	18.4	7	4.4	13.5	-5.9	15.4
8	-0.2	9	-10.5	19.5	8	2.8	9.9	-11.1	21	8	4.6	11.4	-5.4	13.7
9	0.7	9.5	-9.2	18.7	9	3.5	9.3	-10.6	20.1	9	4.2	9	-5.1	14.1
10	2.8	9.2	-9.5	18.5	10	3.6	9.2	-10.7	20.2	10	3.3	8.8	-5.5	13.9
Mean	2.8	9	-9.4	18.3	Mean	3.5	9.2	-10.5	19.8	Mean	3.8	12.1	-5.6	14.2
Slow Walking (SW)	SP(IC)	SP(MIN)	SP(TO)	ROM(SP/PR)	Normal Walking (NW)	SP(IC)	SP(MIN)	SP(TO)	ROM(SP/PR)	Fast Walking (FW)	SP(IC)	SP(MIN)	SP(TO)	ROM(SP/PR)
Forefoot/Hindfoot (FF/HF)					Forefoot/Hindfoot (FF/HF)					Forefoot/Hindfoot (FF/HF)
1	11.6	6.2	15.1	8.9	1	12.3	6.4	13.3	6.9	1	11.9	6.2	14.2	8
2	12	6.2	14.7	8.5	2	12	6.2	14.5	8.3	2	11.7	5.9	13.3	7.4
3	12.2	6.4	14.4	8	3	12.9	7	15.1	8.1	3	11	5.3	14	8.7
4	11.8	6.7	13.3	6.6	4	12.6	6.8	14.5	7.7	4	10.6	6	14.6	8.6
5	11.9	6.4	15.3	8.9	5	12	6.5	14.3	7.8	5	9.6	6	14.2	8.2
6	12.8	6.6	14	7.4	6	12.2	6.5	15.1	8.6	6	10.4	5.5	14	8.5
7	12.6	6.6	13.8	7.2	7	12.3	6.6	14.8	8.2	7	10.1	5.7	13.3	7.6
8	12.8	6.6	15.5	8.9	8	13	6.3	14.6	8.3	8	10.7	6.4	13.6	7.2
9	12.5	7.1	15.1	8	9	12.3	6.3	14.4	8.2	9	10.6	5.9	13.2	7.3
10	12.1	6.7	14.9	7.9	10	12.6	6.4	14.3	7.8	10	10.5	5.7	13.6	7.6
Mean	12.2	6.6	14.6	8	Mean	12.4	6.5	14.5	8	Mean	10.7	5.9	13.8	7.9
Slow Walking (SW)	ADD(IC)	ABD(MAX)	ADD(TO)	ROM(ADD/ABD)	Normal Walking (NW)	ADD(IC)	ABD(MAX)	ADD(TO)	ROM(ADD/ABD)	Fast Walking (FW)	ADD(IC)	ABD(MAX)	ADD(TO)	ROM(ADD/ABD)
Forefoot/Hindfoot (FF/HF)					Forefoot/Hindfoot (FF/HF)					Forefoot/Hindfoot (FF/HF)
1	5.7	-2.4	-0.5	8.1	1	3.4	-3.1	-2.2	5.6	1	-1.2	-4.5	-3	5.1
2	4.2	-3.6	-2	7.8	2	3.2	-3.8	-2.5	7	2	-0.9	-4.4	-0.6	5.1
3	6.3	-2.6	-1.1	8.9	3	5.6	-1.9	-1.5	7.5	3	-0.9	-4.7	-1	5.4
4	4.2	-2.5	-2.3	6.7	4	4.5	-2.4	-2.3	6.9	4	-2.7	-4.6	-2.4	4.2
5	4.7	-4.3	-1.4	9	5	6.1	-2.5	-3	9.1	5	-1.3	-4.6	-1.5	5.3
6	2.4	-3.4	-0.8	5.8	6	3.8	-2.6	-2.1	6.4	6	-0.7	-3.6	-2	4.5
7	3.2	-4.1	-2.5	7.3	7	0.7	-3.9	-1.5	6.4	7	-2.2	-5.1	-2.2	5.6
8	3.9	-2.9	-2.3	6.8	8	2.5	-2.7	-3.1	5.2	8	-2	-5.8	-1.6	4.9
9	1.2	-5	-1.8	6.2	9	3.6	-2.4	-2.4	7.2	9	0.4	-5.4	-0.4	5.8
10	3.8	-3.6	-1.5	7.3	10	3.5	-2.3	-2	6.6	10	-1.1	-4.5	-1.4	5
Mean	4	-3.4	-1.6	7.4	Mean	3.7	-2.8	-2.3	6.8	Mean	-1.3	-4.7	-1.6	5.1
Slow Walking (SW)	DF(IC)	DF(MAX)	PF(MAX)	ROM(DF/PF)	Normal Walking (NW)	DF(IC)	DF(MAX)	PF(MAX)	ROM(DF/PF)	Fast Walking (FW)	DF(IC)	DF(MAX)	PF(MAX)	ROM(DF/PF)
Forefoot/Tibia (FF/TB)					Forefoot/Tibia (FF/TB)					Forefoot/Tibia (FF/TB)
1	6.3	21.4	-6.6	28	1	9.8	18.4	-10.2	28.6	1	16.8	35.3	-4.5	39.8
2	8.5	18.2	-15.9	34.1	2	8.7	19.6	-14.4	34	2	15.9	30.1	-4.6	34.7
3	7.2	18.4	-7.7	26.1	3	10.4	18.2	-10.3	28.5	3	14.1	33.7	-4.8	38.5
4	8.4	21	-2.3	23.3	4	9.6	18.8	-14.3	33.1	4	14.2	30.9	-6	36.9
5	9.2	18.2	-5.5	23.7	5	9.4	15.7	-13.1	28.8	5	11.2	34.1	-7.5	41.6
6	9.7	18.1	-6.4	24.5	6	9.2	17.5	-15.3	32.8	6	14.7	35	-7.7	42.7
7	8.9	20.9	-1.9	22.8	7	6.9	16.4	-10.1	26.5	7	14.4	35.1	-6.2	41.3
8	8.4	18.7	-5.4	24.1	8	8.3	18.2	-14.3	32.5	8	14.1	34	-3.7	37.7
9	9.8	19	-10	29	9	8.5	17.5	-12.4	30.1	9	14.2	32.6	-2.6	35.2
10	9.4	19.2	-7.8	27	10	9.4	18.2	-12.9	31.4	10	14.1	32.8	-0.4	33.2
Mean	8.6	19.3	-7	26.3	Mean	9	17.8	-12.7	30.6	Mean	14.4	33.4	-4.8	38.2
Slow Walking (SW)	SP(IC)	SP(MIN)	SP(MAX)	ROM(SP/PR)	Normal Walking (NW)	SP(IC)	SP(MIN)	SP(MAX)	ROM(SP/PR)	Fast Walking (FW)	SP(IC)	SP(MIN)	SP(MAX)	ROM(SP/PR)
Forefoot/Tibia (FF/TB)					Forefoot/Tibia (FF/TB)					Forefoot/Tibia (FF/TB)
1	5.8	-16.4	16.6	33	1	0.2	-15.9	15.6	31.5	1	-1.3	-11.7	11.9	23.6
2	2.8	-11.8	21.1	32.9	2	1	-14.9	18.1	33	2	-1.9	-11.8	12.4	24.2
3	4.5	-15.4	12.5	27.9	3	5.3	-11.7	18.4	30.1	3	-3.3	-15.4	14.1	29.5
4	1.6	-16	15.6	31.6	4	1.4	-10.3	19.2	29.5	4	-2.9	-11.1	16.8	27.9
5	3.5	-13.5	11.5	25	5	5.2	-11.2	15.9	27.1	5	-2.3	-11.6	16	27.6
6	4.2	-13.9	16.3	30.2	6	1	-11.8	18	29.8	6	-4	-12.5	15.6	28.1
7	3.2	-14.1	14.6	28.7	7	1.8	-9.7	17.8	27.5	7	-6.1	-14.1	12.7	26.8
8	2.3	-12.3	12.9	25.2	8	1.7	-11.8	17.2	29	8	-2.3	-12.4	14.9	27.3
9	3.4	-13	17.8	30.8	9	1.8	-11.7	17	28.7	9	-5.2	-13.7	13.6	27.3
10	0.4	-10.5	17.3	27.8	10	2.4	-12.4	17.9	30.4	10	-3.3	-13.9	11.4	25.3
Mean	3.2	-13.7	15.6	29.3	Mean	2.2	-12.2	17.5	29.7	Mean	-3.3	-12.8	13.9	26.8
Slow Walking (SW)	ADD(IC)	ABD(MAX)	ADD(MAX)	ROM(ADD/ABD)	Normal Walking (NW)	ADD(IC)	ABD(MAX)	ADD(MAX)	ROM(ADD/ABD)	Fast Walking (FW)	ADD(IC)	ABD(MAX)	ADD(MAX)	ROM(ADD/ABD)
Forefoot/Tibia (FF/TB)					Forefoot/Tibia (FF/TB)					Forefoot/Tibia (FF/TB)
1	7.6	-4	8.4	12.4	1	4.2	-5.5	7.1	12.6	1	0.7	-13.1	2.1	15.2
2	7.7	-5	8.6	13.6	2	5.5	-6	7.6	13.6	2	2.6	-13.5	2.8	16.3
3	7.3	-4.8	7.5	12.3	3	9.6	-3.7	9.9	13.6	3	1.8	-15.1	5.7	20.8
4	4.3	-7.2	8.7	15.9	4	6.8	-5.1	7.4	12.5	4	0.4	-13	5.8	18.8
5	7.2	-4.4	7.5	11.9	5	8	-3.9	8.6	12.5	5	0.4	-15.1	4.5	19.6
6	7.1	-6.2	8	14.2	6	5.1	-5.3	7.5	12.8	6	0.1	-14.4	4.8	19.2
7	4.9	-5.2	6.8	12	7	4	-3.9	8	11.9	7	0.1	-13.9	3.4	17.3
8	5.7	-6.2	5.7	11.9	8	4.9	-5.3	6.5	11.8	8	-1.3	-13.4	2.8	16.2
9	6.2	-6.5	7.2	13.7	9	5.7	-4.6	8.3	12.5	9	-1.8	-15.6	3.4	19
10	3.6	-6.5	6.2	12.7	10	6.3	-4.7	7.6	12.8	10	0.6	-14.4	5.2	19.6
Mean	6.2	-5.6	7.5	13.1	Mean	6	-4.8	7.8	12.7	Mean	0.4	-14.2	4.1	18.2
Slow Walking (SW)	DF(IC)	DF(MIN)	DF(TO)	ROM(DF/PF)	Normal Walking (NW)	DF(IC)	DF(MIN)	DF(TO)	ROM(DF/PF)	Fast Walking (FW)	DF(IC)	DF(MIN)	DF(TO)	ROM(DF/PF)
Hallux/Forefoot (HX/FF)					Hallux/Forefoot (HX/FF)					Hallux/Forefoot (HX/FF)
1	28.6	10.7	44.7	24	1	29	8.5	50.7	42.2	1	23.5	11.1	40.2	29.1
2	23.9	6.8	39.7	34.5	2	25.4	7.6	44.3	36.7	2	27.7	12	39.4	27.4
3	26	7.6	47.2	39.6	3	26.4	5.4	44	38.4	3	33.3	11.4	39.9	28.5
4	34.1	9.4	44.5	35.1	4	24.5	6.5	44.7	38.2	4	26.4	10.9	36.6	25.7
5	29.1	8.1	52.3	44.2	5	29	7.8	48	40.2	5	22.2	12.4	32.8	20.4
6	23.4	6.4	47.5	41.1	6	30.8	8.3	42.1	33.8	6	30.8	11.3	39.5	28.2
7	30.6	7.9	45.1	37.2	7	32.1	8.9	46	37.1	7	20.9	11.8	39.7	27.9
8	25.9	7.8	49	41.2	8	32.5	6.8	44	38.2	8	23.7	9.8	36.3	26.5
9	27.6	9.5	46.6	37.1	9	28.1	7.1	44.3	37.6	9	22.3	11.7	37.8	26.1
10	24.1	3.9	44.8	40.9	10	28.9	7.6	46.2	38.5	10	23.8	11	37.3	26.3
Mean	27.3	7.8	46.1	37.5	Mean	28.7	7.5	45.4	38.1	Mean	25.5	11.3	40	26.6
